# Supplementary material for: Structure-Based Virtual Screening of Tumor Necrosis Factor-α Inhibitors by Cheminformatics Approaches and Bio-Molecular Simulation
Source: PubMed Central journal article supplement (PMC7926523; doi:10.3390/biom11020329), 2021-02-22
Supplement: biomolecules-11-00329-s001.pdf [file biomolecules-11-00329-s001.pdf]

# Supporting Information

## Structure based Virtual Screening of Tumor Necrosis Factor- $\alpha$ Inhibitors by Cheminformatics Approaches and Bio-Molecular Simulation

Sobia Ahsan Halim<sup>1\*</sup>, Almas Gul Sikandari<sup>2</sup>, Ajmal Khan<sup>1</sup>, Abdul Wadood<sup>3</sup>, Muhammad  
Qaiser Fatmi<sup>2\*</sup>, René Csuk<sup>4</sup>, Ahmed Al-Harrasi<sup>1,\*</sup>

<sup>1</sup>Natural and Medical Sciences Research Center, University of Nizwa, Birkat Al-Mouz, Nizwa-616, Sultanate of Oman, <sup>2</sup>Department of Biosciences, COMSATS University Islamabad, Park Road, Chak Shahzad, Islamabad-45600, Pakistan, <sup>3</sup>Department of Biochemistry, Abdul Wali Khan University Mardan, Mardan, Pakistan, <sup>4</sup>Martin-Luther-University Halle-Wittenberg, Organic Chemistry, Kurt-Mothes-Str.2, D-06120 Halle (Saale), Germany.

### \*Corresponding Authors:

Sobia Ahsan Halim: [sobia\\_halim@unizwa.edu.om](mailto:sobia_halim@unizwa.edu.om)

Ahmed Al-Harrasi: [aharrasi@unizwa.edu.om](mailto:aharrasi@unizwa.edu.om)

M. Qaiser Fatmi: [qaiser.fatmi@comsats.edu.pk](mailto:qaiser.fatmi@comsats.edu.pk)

### Contents

- Table S1. The chemical structures and biological activities of selected known inhibitors of NF- $\alpha$  (TNFI)
- Table S2. Their physicochemical properties of Selected TNFIs
- Figure S1. (A). The docked conformation of SPD obtained by FRED, AutoDock Vina, MOE and MVD, respectively. The X-ray and Re-docked orientations of SPD are shown in red and magenta stick models, respectively (B) The re-docked orientation of JNJ525 obtained by MOE, FRED, AutoDock Vina, and MVD. The experimental and docked conformations are presented in yellow and green stick model, respectively.
- Figure S2. Percent Enrichment Factor (%EF) calculated for four docking programs on 2AZ5
- Figure S3. Receiver Operating Curve (ROC) for 2AZ5 obtained from FRED, MOE AutoDock Vina, and MVD. AUC for FRED, AutoDock Vina, MOE and MVD. The AUC value of 0.95, 0.86, 0.92 and 0.87 was observed for FRED, MOE, Autodock Vina, and MVD, respectively.
- Figure S4. Superimposed view of Compounds TNFI2, TNFI5, TNFI6, TNFI22, TNFI24 and TNFI39 on LBPM1 and superimposed view of twenty Compounds (TNFI1-11, TNFI15, TNFI20-25, TNFI34 and TNFI41) on LBPM2
- Table S3. Pharmacokinetic and Physiological Properties of 17 selected hits. Interactions Analysis of Compounds 1-3, 6, 8, and 10-17
- Figure S5. The docked view of compounds 1-3, 6, 8, 10-17. The interacting residues of Chain A and B are shown in coral and yellow colour, respectively. The ligands are depicted in magenta stick model. Hydrogen bonds are displayed in green lines. H-bond distances are written in red colour. Compounds numbers are written in parenthesis.

**Table S1. The chemical structures and biological activities of selected known inhibitors of TNF- $\alpha$  (TNFI)**

| TNF Inhibitors (TNFI) | Structures                                                                          | IC <sub>50</sub> ( $\mu$ M) | Reference |
|-----------------------|-------------------------------------------------------------------------------------|-----------------------------|-----------|
| 1                     | 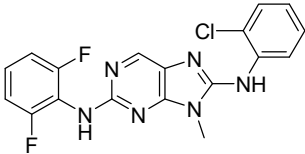   | 1.5                         | 1         |
| 2                     |    | 0.014                       | 1         |
| 3                     |    | 0.048                       | 1         |
| 4                     |   | 0.035                       | 1         |
| 5 <sup>†</sup>        |  | 0.004                       | 1         |
| 6                     |  | 0.004                       | 1         |
| 7                     |  | 0.06                        | 2         |
| 8                     |  | 0.06                        | 2         |

|                |                                                                                     |      |   |
|----------------|-------------------------------------------------------------------------------------|------|---|
| 9 <sup>r</sup> | 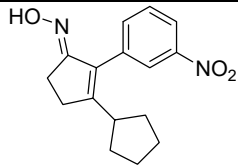   | 0.24 | 3 |
| 10             |    | 0.26 | 3 |
| 11             |    | 2    | 4 |
| 12             |  | 36   | 4 |
| 13             |  | 9    | 4 |
| 14             |  | 36   | 5 |

|    |                                                                                     |       |   |
|----|-------------------------------------------------------------------------------------|-------|---|
| 15 | 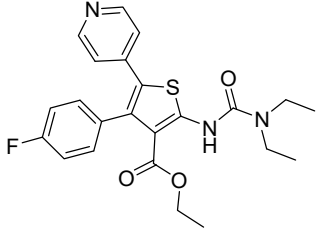   | 2.6   | 5 |
| 16 |    | 5.4   | 5 |
| 17 |    | 10    | 5 |
| 18 |  | 5.8   | 6 |
| 19 |  | 7.3   | 6 |
| 20 |  | 2     | 7 |
| 21 |  | 3     | 7 |
| 22 |  | 0.004 | 8 |

|                 |                                                                                     |       |    |
|-----------------|-------------------------------------------------------------------------------------|-------|----|
| 23              | 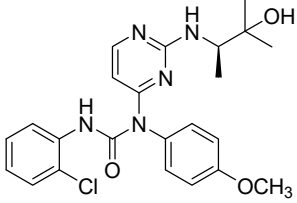   | 0.092 | 8  |
| 24 <sup>t</sup> |    | 0.009 | 8  |
| 25              |    | 0.071 | 8  |
| 26              |   | 31    | 9  |
| 27              |  | 60    | 9  |
| 28              |  | 22    | 10 |

|    |                                                                                     |    |    |
|----|-------------------------------------------------------------------------------------|----|----|
| 29 | 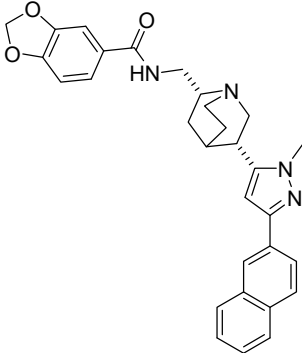   | 5  | 10 |
| 30 |    | 30 | 10 |
| 31 |   | 50 | 10 |
| 32 |  | 50 | 10 |
| 33 |  | 10 | 10 |
| 34 |  | 10 | 10 |

|                 |                                                                                     |        |    |
|-----------------|-------------------------------------------------------------------------------------|--------|----|
| 35              | 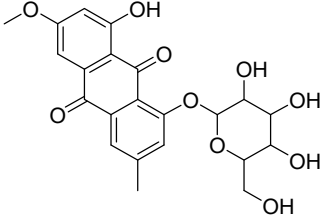   | 20     | 10 |
| 36              |    | 14     | 11 |
| 37              |   | >100   | 11 |
| 38              |  | >100   | 11 |
| 39 <sup>†</sup> |  | 0.0063 | 12 |
| 40              |  | 6.8    | 13 |
| 41 <sup>†</sup> |  | 0.048  | 14 |

|    |                                                                                                                                   |      |    |
|----|-----------------------------------------------------------------------------------------------------------------------------------|------|----|
| 42 | 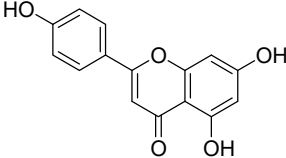<br><chem>Oc1ccc(cc1)-c2cc(O)c(O)c(=O)c2O</chem> | 27.4 | 15 |
|----|-----------------------------------------------------------------------------------------------------------------------------------|------|----|

† *Compounds used in 2D-Similarity searching*

*Compounds TNF12, TNF15, TNF16, TNF122, TNF124 and TNF139 were used in the generation of LBPM1*

*Compounds TNF11-11, TNF115, TNF120-25, TNF134 and TNF141 were used in the generation of LBPM2*



**Table S2. Their physicochemical properties of Selected TNFIs**

| Compounds | MW       | TPSA     | logP(o/w) | HBA | HBD | RB |
|-----------|----------|----------|-----------|-----|-----|----|
| 1         | 386.7930 | 67.6600  | 4.2941    | 3   | 2   | 4  |
| 2         | 416.8830 | 43.6000  | 5.8321    | 3   | 0   | 5  |
| 3         | 381.3860 | 64.8600  | 4.5691    | 3   | 1   | 5  |
| 4         | 385.3490 | 64.8600  | 4.4241    | 3   | 1   | 5  |
| 5         | 399.3760 | 64.8600  | 4.8861    | 3   | 1   | 5  |
| 6         | 414.7990 | 69.9000  | 4.6631    | 4   | 0   | 5  |
| 7         | 461.2990 | 46.6100  | 4.9890    | 2   | 0   | 5  |
| 8         | 414.2990 | 46.6100  | 4.5970    | 2   | 0   | 5  |
| 9         | 286.3310 | 78.4100  | 3.6460    | 2   | 1   | 3  |
| 10        | 277.3140 | 32.5900  | 4.0150    | 2   | 1   | 2  |
| 11        | 473.5080 | 79.8200  | 3.1020    | 5   | 1   | 5  |
| 12        | 441.4630 | 89.0500  | 1.2320    | 6   | 1   | 6  |
| 13        | 455.4900 | 100.0500 | 1.4890    | 6   | 2   | 5  |
| 14        | 394.4460 | 68.2900  | 4.0850    | 3   | 1   | 8  |
| 15        | 441.5270 | 71.5300  | 4.5790    | 3   | 1   | 10 |
| 16        | 412.4850 | 68.2900  | 4.9010    | 3   | 1   | 8  |
| 17        | 394.4740 | 59.9300  | 4.5760    | 4   | 1   | 7  |
| 18        | 374.2060 | 77.5800  | 4.5476    | 4   | 1   | 1  |
| 19        | 478.1830 | 77.5800  | 5.9661    | 4   | 1   | 3  |
| 20        | 329.3960 | 57.6500  | 2.0697    | 5   | 0   | 10 |
| 21        | 269.3440 | 39.1900  | 2.3710    | 3   | 0   | 8  |
| 22        | 381.4110 | 80.2400  | 2.8890    | 4   | 1   | 8  |
| 23        | 455.9460 | 99.6100  | 3.5720    | 5   | 3   | 9  |
| 24        | 393.4470 | 99.6100  | 1.9470    | 5   | 3   | 9  |
| 25        | 369.8120 | 100.0300 | 0.9650    | 5   | 3   | 7  |
| 26        | 370.3540 | 123.9100 | -0.0845   | 8   | 3   | 5  |
| 27        | 486.4260 | 176.5100 | -1.0430   | 10  | 3   | 11 |
| 28        | 549.6370 | 37.7100  | 5.5668    | 4   | 0   | 9  |
| 29        | 494.5950 | 68.6200  | 4.2630    | 5   | 1   | 6  |
| 30        | 471.6050 | 82.2800  | 3.1580    | 5   | 4   | 7  |
| 31        | 302.2380 | 127.4500 | 2.0320    | 6   | 5   | 1  |
| 32        | 835.8950 | 75.9900  | 8.8740    | 3   | 2   | 0  |
| 33        | 522.6380 | 99.130   | 1.8390    | 4   | 1   | 2  |
| 34        | 502.9420 | 115.7700 | 8.1920    | 4   | 1   | 6  |
| 35        | 446.4080 | 162.9800 | 0.4820    | 10  | 5   | 4  |
| 36        | 528.5860 | 149.8700 | 4.3020    | 7   | 4   | 6  |
| 37        | 368.2400 | 66.4000  | 4.8600    | 3   | 2   | 3  |
| 38        | 301.7250 | 66.4000  | 3.1270    | 3   | 2   | 3  |
| 39        | 334.3540 | 76.8200  | 3.7770    | 4   | 3   | 3  |
| 40        | 426.8830 | 86.1000  | 2.4195    | 5   | 2   | 7  |
| 41        | 395.4560 | 136.9900 | 0.1430    | 6   | 5   | 12 |
| 42        | 270.2400 | 86.9900  | 2.5340    | 4   | 3   | 1  |

MW = Molecular weight, TPSA = Topological polar surface area, logP(o/w) = logP(octanol/water), HBD = Hydrogen Bond Donors, HBA = Hydrogen Bond Acceptors, RB = Number of Rotatable Bonds

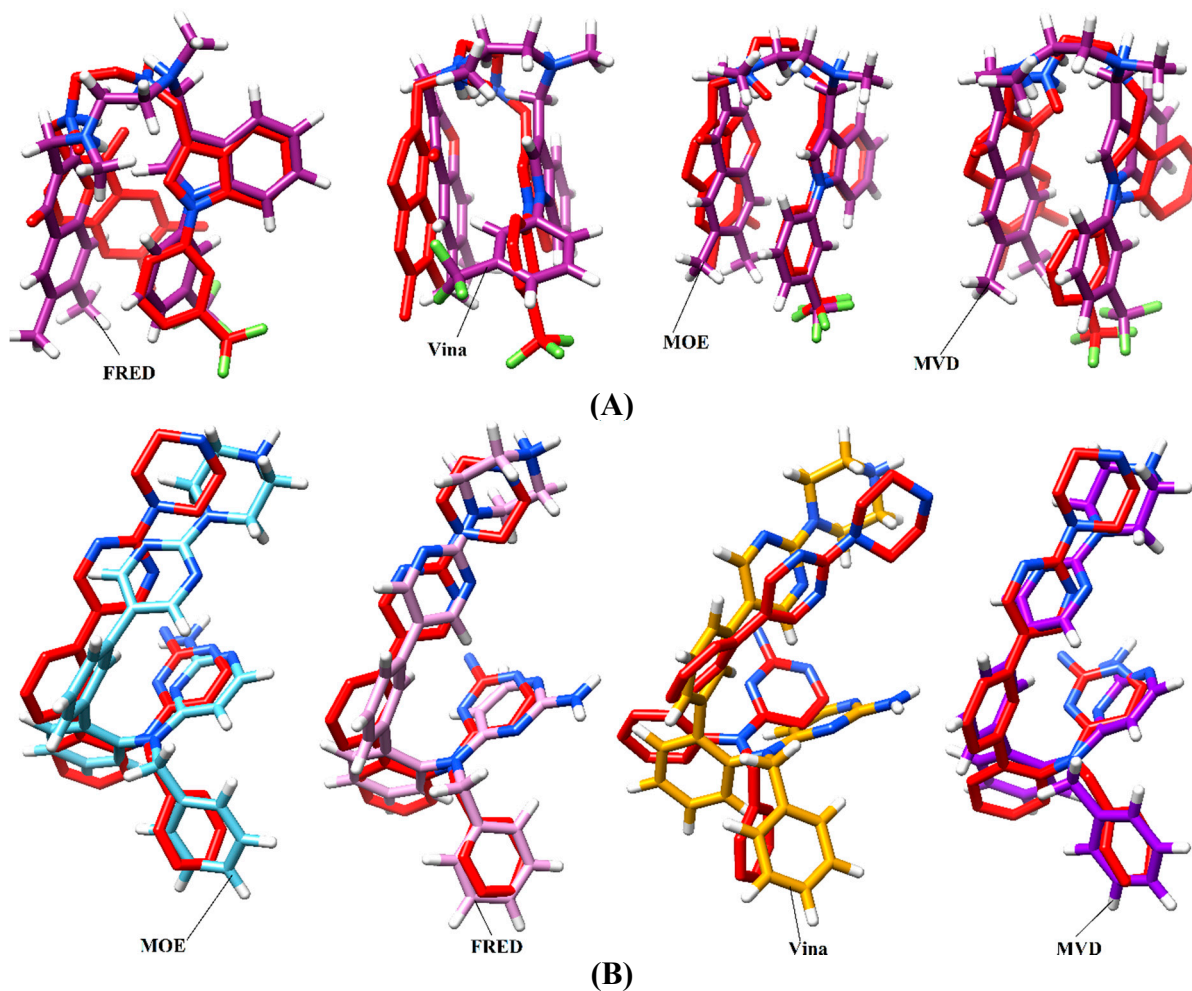

**Figure S1.** (A). The docked conformation of **SPD** obtained by FRED, AutoDock Vina, MOE and MVD, respectively. The X-ray and Re-docked orientations of **SPD** are shown in red and magenta stick models, respectively (B) The re-docked orientation of **JNJ525** obtained by MOE, FRED, AutoDock Vina, and MVD. The experimental and docked conformations are presented in yellow and green stick model, respectively.

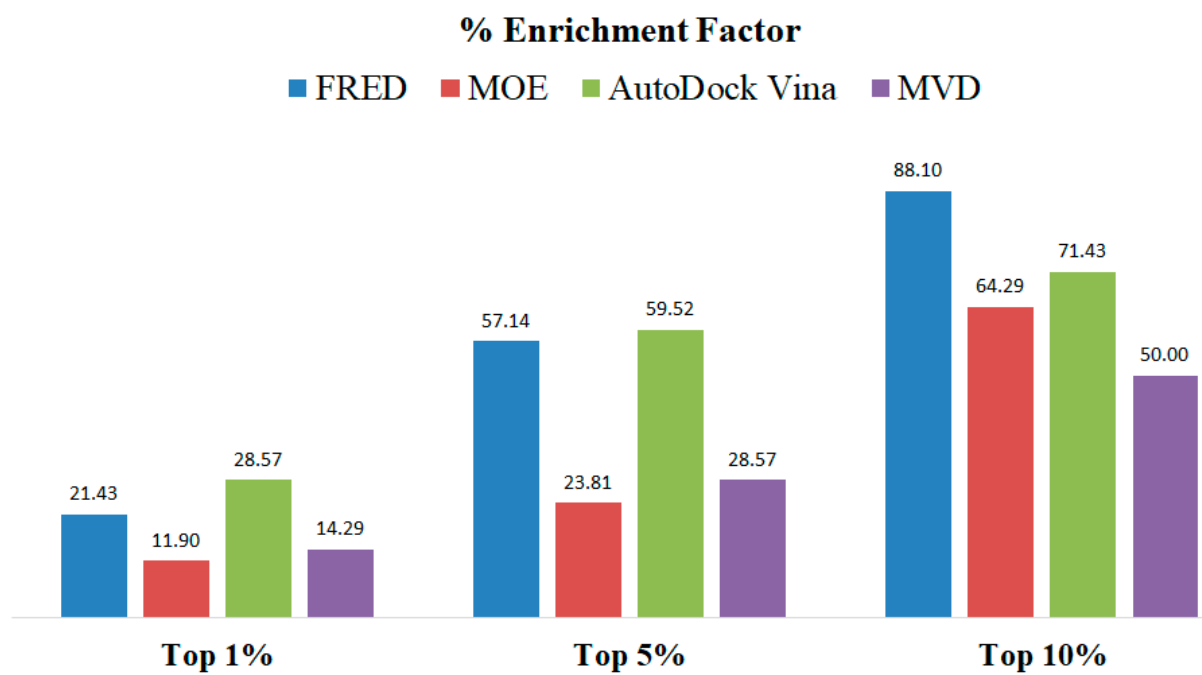

**Figure S2.** Percent Enrichment Factor (%EF) calculated for four docking programs on 2AZ5

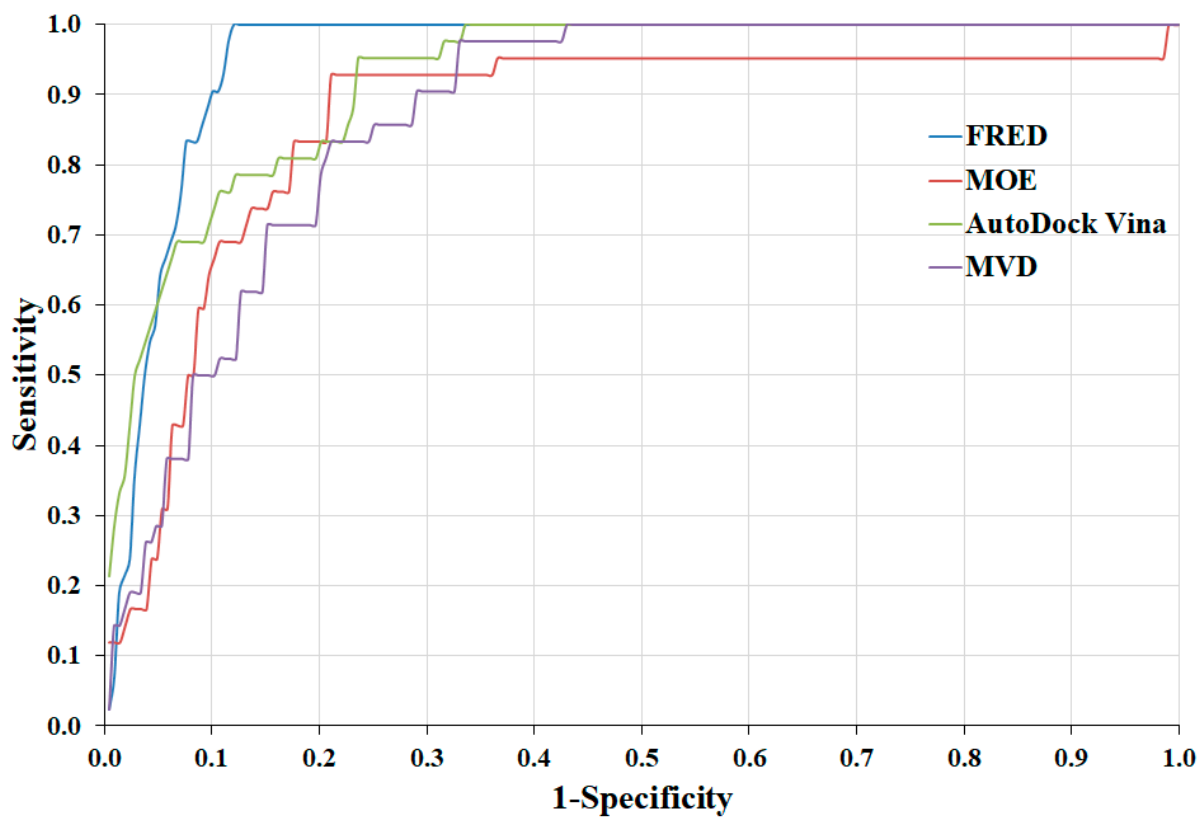

**Figure S3.** Receiver Operating Curve (ROC) for 2AZ5 obtained from FRED, MOE AutoDock Vina, and MVD. AUC for FRED, AutoDock Vina, MOE and MVD. The AUC value of 0.95, 0.86, 0.92 and 0.87 was observed for FRED, MOE, Autodock Vina, and MVD, respectively.

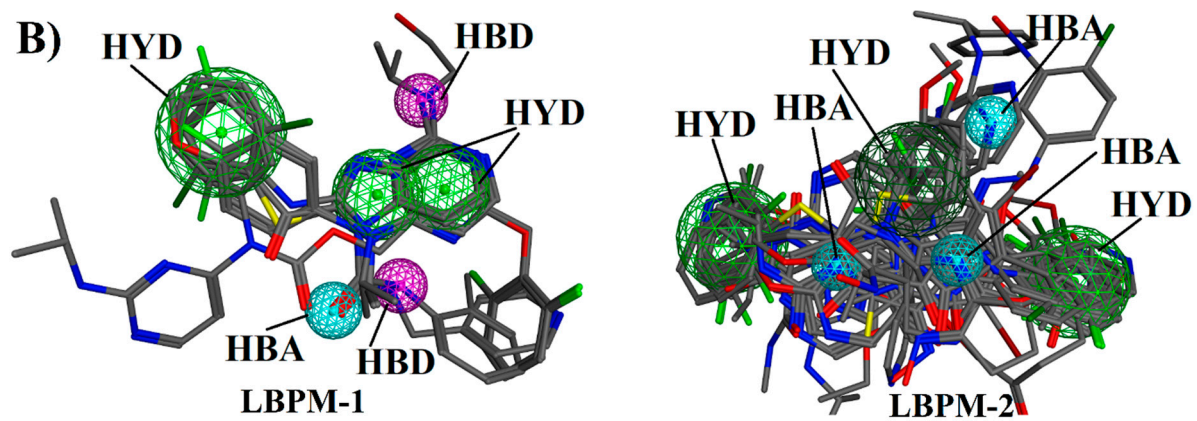

**Figure S4.** Superimposed view of Compounds TNFI2, TNFI5, TNFI6, TNFI22, TNFI24 and TNFI39 on LBPM1 and superimposed view of twenty Compounds (TNFI1-11, TNFI15, TNFI20-25, TNFI34 and TNFI41) on LBPM2

**Table S3.** Pharmacokinetic and Physiological Properties of 17 selected hits.

| Comp # | Pharmacokinetics |     |                                                                                                                                  | AMES toxicity | Acute Oral Toxicity | Carcinogenicity | Rat Acute Toxicity [LD <sub>50</sub> , mol/kg] | Physicochemical Properties                                                                                                                      | Drug Likeness | SA   |
|--------|------------------|-----|----------------------------------------------------------------------------------------------------------------------------------|---------------|---------------------|-----------------|------------------------------------------------|-------------------------------------------------------------------------------------------------------------------------------------------------|---------------|------|
|        | HIA              | BBB | CYP inhibition/substrate                                                                                                         |               |                     |                 |                                                |                                                                                                                                                 |               |      |
| 1      | High             | Yes | P-gpS: Yes,<br>NS: CYP2C9, 2D6,<br>S: CYP3A4, I:<br>CYP1A2, 2C9,<br>2C19, 3A4,<br>NI: CYP2D6,<br>Log K <sub>p</sub> : -6.22 cm/s | None          | III                 | None            | 2.36                                           | F:C21H16CIF2NO2, MW:387.81g/mol HA:27,<br>RB:2, HBA:4, HBD:1, TPSA:46.17Å <sup>2</sup> ,<br>LogP <sub>o/w</sub> : 2.66, Log S: -4.61 (MS)       | Yes           | 4.25 |
| 2      | High             | Yes | P-gpS: Yes,<br>NS: CYP2C9, 2D6,<br>S: CYP3A4,<br>NI: CYP1A2, 2D6,<br>I: CYP2C9, 3A4,<br>Log K <sub>p</sub> : -6.37 cm/s          | None          | III                 | None            | 2.75                                           | F:C23H20F3NO3, MW: 415.41 g/mol, HA:<br>30, RB: 4, HBA: 6, HBD: 1, TPSA: 55.40Å <sup>2</sup> ,<br>LogP <sub>o/w</sub> : 2.74, LogS: -4.63(MS)   | Yes           | 4.35 |
| 3      | High             | Yes | P-gpS: Yes,<br>NS: CYP2C9, 2D6<br>S: CYP3A4,<br>I: CYP2C9,<br>2C19,3A4,<br>NI: CYP1A2,2D6,<br>Log K <sub>p</sub> : -6.82 cm/s    | None          | III                 | None            | 2.61                                           | F: C23H22FNO4, MW:395.42 g/mol, HA: 29,<br>RB: 4, HBA: 5, HBD: 1, TPSA:64.63Å <sup>2</sup> ,<br>LogP <sub>o/w</sub> : 2.66, LogS: -4.01(MS)     | Yes           | 4.29 |
| 4      | High             | Yes | P-gpS: No,<br>NS: CYP2C9,2D6<br>S: CYP3A4,<br>I: CYP2C9,<br>2C19,3A4,<br>I:CYP1A2,2D6,<br>Log K <sub>p</sub> : -7.04 cm/s        | None          | III                 | None            | 2.22                                           | F:C23H19CIFN3O3, MW: 439.87 g/mol, HA:<br>31, RB:1, HBA: 5, HBD: 1, TPSA: 69.72Å <sup>2</sup> ,<br>LogP <sub>o/w</sub> : 3.03, LogS: -4.51 (MS) | Yes           | 4.58 |
| 5      | High             | Yes | P-gpS: No,<br>NS: CYP2C9,2D6<br>S: CYP3A4<br>I: CYP2C19, 3A4                                                                     | None          | III                 | None            | 2.33                                           | F: C25H23CIN2O4,MW:450.91g/mol<br>HA: 32, RB: 2, HBA: 5, HBD: 0, TPSA:<br>66.92Å <sup>2</sup> , LogP <sub>o/w</sub> : 3.61, LogS: -4.76 (MS)    | Yes           | 4.67 |

|    |      |     |                                                                                                      |      |     |      |      |                                                                                                                                    |     |      |
|----|------|-----|------------------------------------------------------------------------------------------------------|------|-----|------|------|------------------------------------------------------------------------------------------------------------------------------------|-----|------|
|    |      |     | NI: CYP1A2,2C9, 2D6, Log $K_p$ : -6.82 cm/s                                                          |      |     |      |      |                                                                                                                                    |     |      |
| 6  | High | Yes | P-gpS: Yes, NS: CYP2C9,2D6, S: CYP3A4, I: CYP2C9, 2C19, 3A4, NI: CYP1A2,2D6, Log $K_p$ : -5.87 cm/s  | None | III | None | 2.78 | F:C25H24N2O3, MW: 400.47 g/mol, HA:30, RB:2, HBA:4, HBD:2, TPSA: 71.45 Å <sup>2</sup> , Log $P_o/w$ : 3.26, LogS: -5.14 (MS)       | Yes | 4.16 |
| 7  | High | Yes | P-gpS: Yes, NS: CYP2C9, 2D6 S: CYP3A4, I: CYP1A2, 2C9, 2C19, 3A4, NI: CYP2D6 Log $K_p$ : -6.51 cm/s  | None | III | None | 2.53 | F:C26H21FN4O3, MW:456.47 g/mol, HA: 34, RB:4, HBA: 6, HBD: 1, TPSA:73.66Å <sup>2</sup> , Log $P_o/w$ : 3.04, LogS: -5.19 (MS)      | Yes | 4.99 |
| 8  | High | No  | P-gpS: Yes, NS: CYP2C9, 2D6, S:CYP3A4, I:CYP1A2,2C9, 2C19, 3A4, NI: CYP2D6, Log $K_p$ : -7.19 cm/s   | None | III | None | 2.53 | F:C22H21N5O3, MW: 403.43g/mol HA: 30, RB: 4, HBA: 6, HBD: 1 TPSA: 91.16 Å <sup>2</sup> , Log $P_o/w$ : 2.70, LogS: -3.89 (Soluble) | Yes | 4.61 |
| 9  | High | No  | P-gpS: Yes, NS: CYP2C9, 2D6 S: CYP3A4, I: CYP2C9, 2D6, 2C19, 3A4, NI: CYP1A2, Log $K_p$ : -7.54 cm/s | None | III | None | 2.32 | F: C25H22CIN3O5, MW: 479.91 g/mol, HA: 34, RB:3, HBA: 6, HBD: 1, TPSA: 96.02 Å <sup>2</sup> , Log $P_o/w$ : 3.22, LogS: -4.38 (MS) | Yes | 4.81 |
| 10 | High | Yes | P-gpS: No, NS: CYP2C9, 2D6 S: CYP3A4, I:CYP1A2,2C9, 2C19, 3A4, NI: CYP2D6, Log $K_p$ : -6.44cm/s     | Yes  | III | None |      | F:C18H21N4O, MW: 309.39 g/mol HA: 23, RB:6, HBA: 3, HBD: 1 TPSA: 67.58 Å <sup>2</sup> , Log $P_o/w$ : 2.83, LogS: -3.46 (Soluble)  | Yes | 3.28 |

|    |      |     |                                                                                                                       |      |     |      |      |                                                                                                                                              |     |      |
|----|------|-----|-----------------------------------------------------------------------------------------------------------------------|------|-----|------|------|----------------------------------------------------------------------------------------------------------------------------------------------|-----|------|
| 11 | High | Yes | P-gpS: No,<br>NS: CYP2C9, 2D6,<br>3A4, I: CYP1A2,<br>2C19, NI: CYP2C9,<br>2D6, 3A4, Log $K_p$ :-<br>5.37 cm/s         | None | III | None | 2.53 | F:C16H18F3NO, MW: 297.32 g/mol<br>HA: 21, RB: 6, HBA: 4, HBD: 1, TPSA: 29.10<br>$\text{\AA}^2$ , Log $P_o/w$ : 2.97, LogS: -3.93 (MS)        | Yes | 2.89 |
| 12 | High | Yes | P-gpS: Yes,<br>NS: CYP2C9, 3A4<br>S: CYP2D6, I:<br>CYP1A2, 2C9,<br>2C19, 3A4, NI:<br>CYP2D6,<br>Log $K_p$ :-6.46 cm/s | None | III | None | 2.76 | F:C19H17N3OS, MW: 335.42 g/mol<br>HA: 24, RB: 3, HBA: 3, HBD: 0<br>TPSA: 71.39 $\text{\AA}^2$ , Log $P_o/w$ : 2.63, LogS: -3.89<br>(Soluble) | Yes | 2.51 |
| 13 | High | No  | P-gpS: No,<br>NS: CYP450 2C9,<br>2D6, 3A4<br>NI: CYP450 1A2,<br>2C9,2D6,2C19,3A4<br>Log $K_p$ :-6.52 cm/s             | None | III | None | 2.19 | F:C17H13FN2O3, MW: 312.30 g/mol, HA:<br>23, RB: 3, HBA: 4, HBD: 2, TPSA: 75.27 $\text{\AA}^2$ ,<br>Log $P_o/w$ :1.47, LogS: -3.46 (Soluble)  | Yes | 2.59 |
| 14 | High | No  | P-gpS: No,<br>NS: CYP2C9, 2D6<br>S: CYP3A4, I:<br>CYP1A2, 2C9,<br>2C19, 3A4, NI:<br>CYP2D6<br>Log $K_p$ :-6.01 cm/s   | None | III | None | 2.54 | F:C22H16ClN3O4S, MW: 453.90 g/mol, HA:<br>31, RB: 5, HBA: 5, HBD: 1, TPSA: 113.90<br>$\text{\AA}^2$ , Log $P_o/w$ : 3.05, LogS: -5.42 (MS)   | Yes | 3.39 |
| 15 | High | Yes | P-gpS: No,<br>NS: CYP2C9, 2D6,<br>3A4, I: CYP1A2,<br>2C9, 2D6, 2C19,<br>3A4, Log $K_p$ :-5.08<br>cm/s                 | Yes  | III | None | 2.60 | F:C21H15N3O, MW: 325.36 g/mol<br>HA: 25, RB: 3, HBA: 3, HBD: 1, TPSA: 61.70<br>$\text{\AA}^2$ , Log $P_o/w$ : 2.74, LogS: -5.07 (MS)         | Yes | 2.54 |
| 16 | High | Yes | P-gpS: Yes,<br>NS: CYP2C9, 2D6<br>S: CYP3A4, I:<br>CYP2D6, NI:<br>CYP450 1A2, 2C9,<br>2C19, 3A4                       | None | III | None | 2.65 | F:C22H29N2O2S, MW: 385.54 g/mol<br>HA: 27, RB:5, HBA: 2, HBD: 2, TPSA: 62.44<br>$\text{\AA}^2$ , Log $P_o/w$ : 3.77, LogS: -5.10 (MS)        | Yes | 4.28 |



|    |      |     |                                                                                                                       |      |     |      |      |                                                                                                                                                                                 |     |      |
|----|------|-----|-----------------------------------------------------------------------------------------------------------------------|------|-----|------|------|---------------------------------------------------------------------------------------------------------------------------------------------------------------------------------|-----|------|
|    |      |     | Log $K_p$ : -5.42 cm/s                                                                                                |      |     |      |      |                                                                                                                                                                                 |     |      |
| 17 | High | Yes | P-gpS: Yes,<br>NS: CYP2C9, 2D6<br>S: CYP3A4, I:<br>CYP2C19, 3A4,<br>2C9, NI: CYP1A2,<br>2D6<br>Log $K_p$ : -6.61 cm/s | None | III | None | 2.70 | F: C <sub>24</sub> H <sub>25</sub> NO <sub>4</sub> , MW: 391.46 g/mol<br>HA: 29, RB: 4, HBA: 4, HBD: 1, TPSA: 64.63<br>Å <sup>2</sup> , Log $P_o/w$ : 3.05, Log $S$ : -4.15(MS) | Yes | 4.45 |

HIA: Human Intestinal Absorption, BBB: Blood Brain Barrier, P-gpS: P-Glycoprotein substrate, I = Inhibitor, NI = Non-inhibitor, S = Substrate, NS = non-substrate, CIP: CYP Inhibitory Promiscuity, Log  $K_p$  = skin permeation, F= Formula, MW= Molecular Weight, HA = Number of Heavy Atoms, RB = Number of Rotatable bonds, HBA = Number of H-bond acceptors, HBD = Number of H-bond donors, TPSA = Topological Polar Surface Area, Log  $P_o/w$ = Lipophilicity, Log  $S$ = Water Solubility, MS= Moderately soluble, Log  $K_p$  = Skin Permeation, III: Category III includes compounds with LD<sub>50</sub> values >500mg/kg but <5000mg/kg, SA = Synthetic Accessibility

### **Interactions Analysis of Compounds 1-3, 6, 8, and 10-17**

The binding mode of compound 1 revealed that the quinolone nitrogen and the quinolone carbonyl of 1 mediates H-bonding with Gly121A (1.9Å) and Tyr151B (2.5Å), respectively. Moreover, several residues including Tyr59A, Gln61A, Tyr119A, Tyr151A, Tyr59B, and Tyr119B provide hydrophobic (HYD) interactions thus support the fitting of the compound between chains A and B. These interactions suggest that the compound hinders the binding of the TNF- $\alpha$  receptor at the TNF- $\alpha$ /TNFR binding interface.

The hydro-quinolinedione of compound 2 mediates bi-dentate interactions with Tyr51B (2.70Å) and Gly121A (2.13Å). A strong  $\pi$ - $\pi$  interaction is observed between tri-fluoro substituted phenyl ring and Tyr119B. Moreover, hydroquinolinedione moiety is hydrophobically stabilized by Tyr59B. Hence both H-bond and hydrophobic interactions collectively stabilize the compound in the binding region.

The hydroquinolinedione moiety of compound 3 interacts with both chains A and B. The quinoline -NH3 donates H-bond to the carbonyl of Gly121A (1.87Å) while quinoline -carbonyl accepts H-bond from -OH of Tyr151B (2.38Å). Additionally, dimethoxy substituted phenyl ring mediates CH3- $\pi$  interactions with the phenyl of Tyr59A. Compound 6 neatly fits in the ligand binding site and forms H-bond with -OH of Tyr151A (3.0Å). Additionally, Tyr59A provides strong  $\pi$ - $\pi$  interactions to the pyridine moiety of the compound. Similarly, Leu57B stabilizes the compound via HYD interactions. Moreover, chain B of TNF- $\alpha$  provides several HYD interactions to the methoxy phenol of the compound. Compound 6 interacted with -OH of Tyr151B. The dimethoxy phenyl mediates H-bond with -OH of Tyr151B (3.3Å). Moreover, fluorophenyl mediates strong  $\pi$ - $\pi$  interactions with Tyr119A.

The compound 8 forms multiple H-bonds with the receptor binding site of TNF- $\alpha$ . The phenyl-substituted acetate interacts with the -OH of Tyr151A (2.5Å) while pyrrolidinone NH3 donates H-bond to peptide carbonyl (1.97Å). Similarly, the carbonyl of pyrrolidinone ring accepts H-bond from the -OH of Tyr151B (2.73Å).

The peptide-NH3 of compound 10 donates H-bond to the carbonyl of Gly121A (1.82Å). This compound mainly interacts with Chain A of TNF- $\alpha$ . Moreover, the hydrocarbon ring interacts with Leu57A, Leu57B and Tyr59B.

Compound 11 is stabilized by two H-bonds with both chains. The peptide carbonyl accepts H-bond from the -OH of Tyr151B (3.30Å), while the quinoline substituted pyridine ring accepts H-bond from -OH of Tyr151A (2.60Å). The H-bond distances show that the orientation of compound is more towards the chain A, while weak H-bonds can exist between compound and chain B.

Compound 12 interacts with the chain B via two H-bonds. The pyrimidine trione-NH3 formed H-bonds with carbonyl of Leu120B and -OH of Tyr151B at a distance of 2.40Å and 2.37Å, respectively. However, phenyl and the fluorophenyl ring is tilted towards Tyr59B and chain A, respectively.

Compound 13 mediates H-bonding with the chain B while interacts hydrophobically with chain A. The thioxo-imidazolidinone -NH3 of 14 forms H-bond with carbonyl of Ser60B (2.08Å). While -OH of Tyr151B donates H-bond to the carbonyl of thioxo-imidazolidinone ring (3.0Å). The quinoline substituted chlorophenyl ring forms HYD interaction with Leu57B.

The compound 15 interacts with chain A via H-bonds. The benzo-imidazole -NH3 is H-bonded to the carbonyl of Gly121 (1.80Å). The diphenyl substituted methoxy group accepts H-bond from -OH of Tyr151A (3.05Å). The benzo-imidazole ring fits towards chain B, while diphenyl ring is tilted towards chain A.

The piperidinol ring and phenothiazine moiety of compound 16 is oriented towards the chain A and B, respectively. The piperidinol is H-bonded to -OH of Tyr151A (2.76Å). The phenothiazine moiety mainly faces Leu57B, Tyr59B, Gly121B, and Gly122B. Hence both HYD and H-bonding stabilize the compound at this interface.

The -NH3 and carbonyl of quinoline-dione moiety of compound 17 interact with the carbonyl of Gly121A and -OH of Tyr151B with the distance of 2.21Å and 2.33Å, respectively. The quinoline substituted phenyl ring is oriented towards Tyr119A and Tyr119B. The binding modes of the selected hits are depicted in **Figure S4**. The H-bond distances are written in figure.

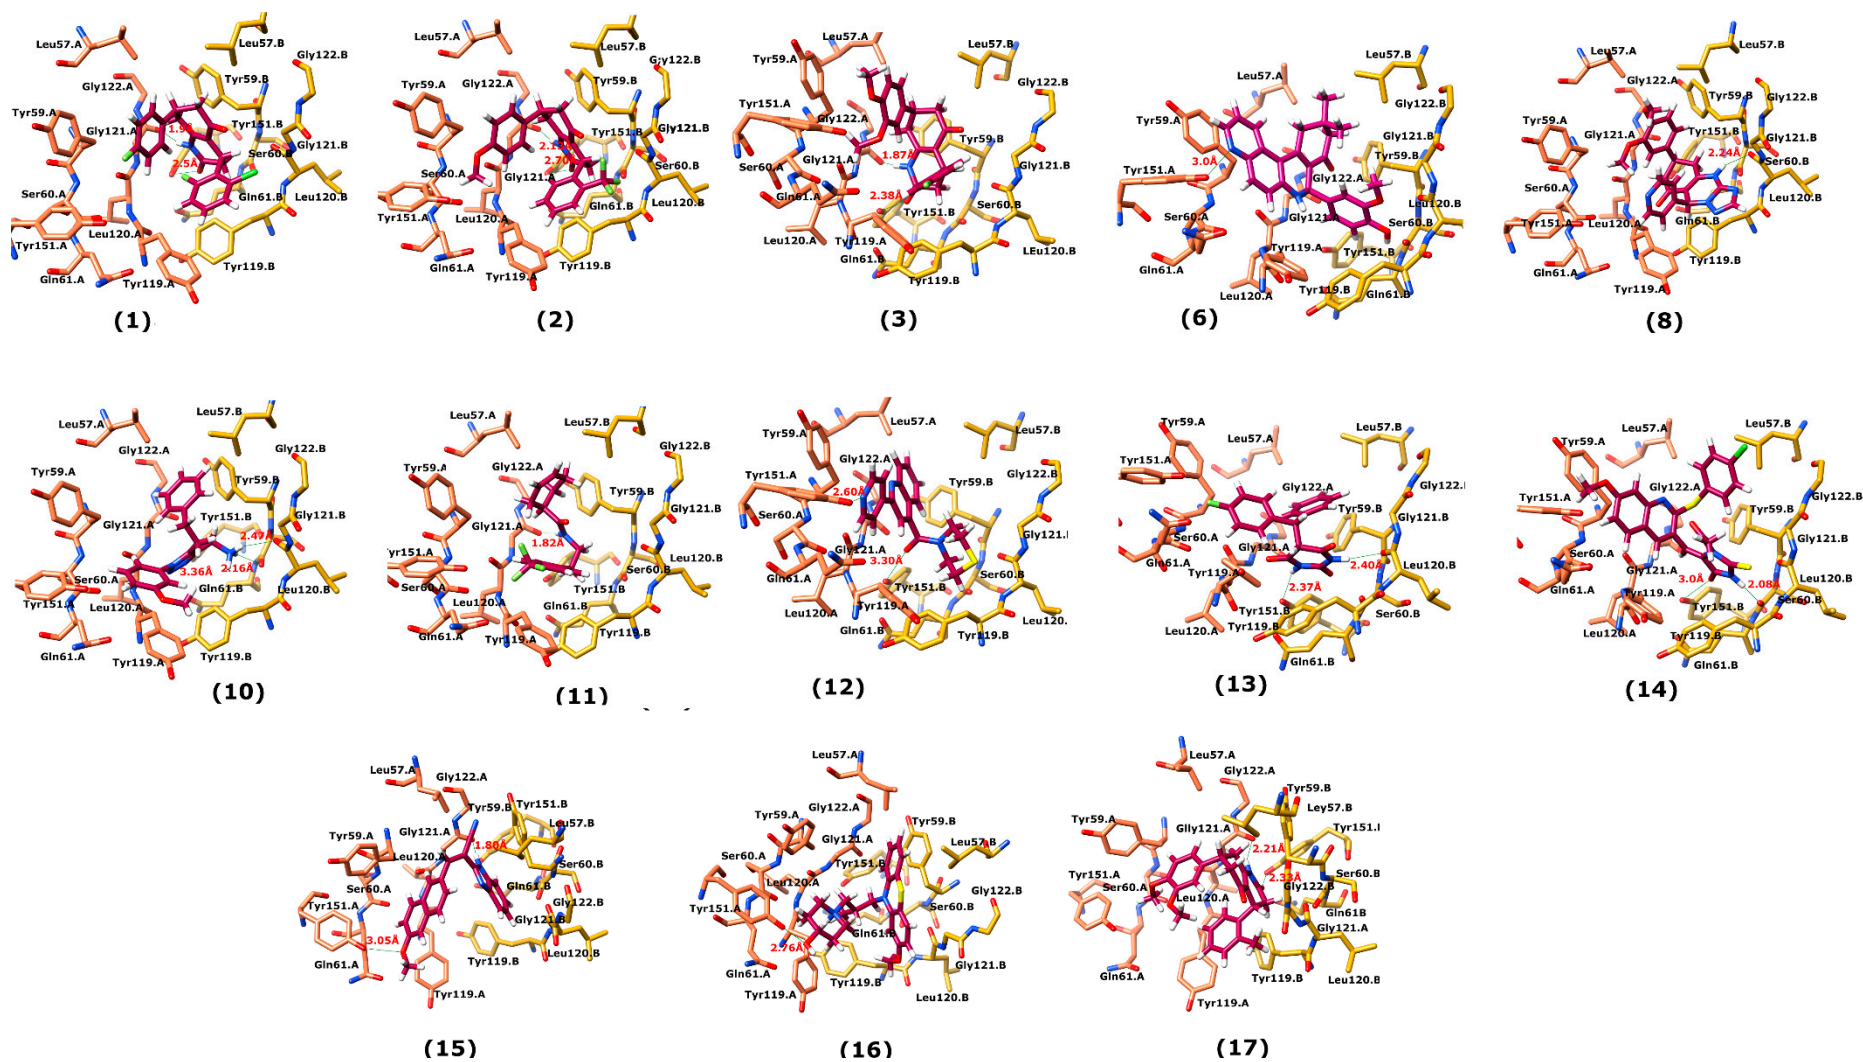

**Figure S5.** The docked view of compounds 1-3, 6, 8, 10-17. The interacting residues of Chain A and B are shown in coral and yellow colour, respectively. The ligands are depicted in magenta stick model. Hydrogen bonds are displayed in green lines. H-bond distances are written in red colour. Compounds numbers are written in parenthesis.

## References

1. Sabat, M., et al. The development of novel C-2, C-8, and N-9 trisubstituted purines as inhibitors of TNF- $\alpha$  production. *ChemInform*, **2006**, *37*, 4360–4365.
2. Cheng, J. F., et al. Discovery and structure-activity relationship of coumarin derivatives as TNF- $\alpha$  inhibitors. *ChemInform*, **2004**, *35*, 2411–2415.
3. Kim, Y., et al. Synthesis and structure-activity relationship of cyclopentenone oximes as novel inhibitors of the production of tumor necrosis factor- $\alpha$ . *Bioorg. Med. Chem. Lett.* **2014**, *24*, 2807–2810.
4. Laufersweiler, M., et al. The development of novel inhibitors of tumor necrosis factor- $\alpha$  (TNF- $\alpha$ ) production based on substituted [5,5]-bicyclic pyrazolones. *ChemInform*, **2004**, *35*, 4267–4272.
5. Fujita, M., Hirayama, T., and Ikeda, N. Design, synthesis, and bioactivities of novel diarylthiophenes: Inhibitors of tumor necrosis factor- $\alpha$  (TNF- $\alpha$ ) production. *Bioorg. Med. Chem.* **2002**, *10*, 3113–3122.
6. Guirado, A., et al. First synthesis and biological evaluation of 4-amino-2-aryl-6,9-dichlorobenzo[g]pteridines as inhibitors of TNF- $\alpha$  and IL-6. *Eur. J. Med. Chem.* **2013**, *66*, 269–275.
7. Dhuru, S., et al. Novel diarylheptanoids as inhibitors of TNF- $\alpha$  production. *Bioorg. Med. Chem. Lett.* **2011**, *21*, 3784–3787.
8. Mouchlis, V., et al. Molecular modeling on pyrimidine-urea inhibitors of TNF- $\alpha$  production: An integrated approach using a combination of molecular docking, classification techniques, and 3D-QSAR CoMSIA. *J. Chem. Inf. Model.* **2012**, *52*, 711–723.
9. Shah, M. R., et al. Synthesis of new bergenin derivatives as potent inhibitors of inflammatory mediators NO and TNF- $\alpha$ . *Bioorg. Med. Chem. Lett.* **2012**, *22*, 2744–2747.
10. Chen, S., et al. Discovery of Novel Ligands for TNF- $\alpha$  and TNF Receptor-1 through Structure-Based Virtual Screening and Biological Assay. *J. Chem. Inf. Model.* **2017**, *57*, 1101–1111.
11. Shen, Qi., et al. Discovery of highly potent TNF $\alpha$  inhibitors using virtual screening. *Eur. J. Med. Chem.* **2014**, *85*, 119–126
12. Henry, J. R., et al. Potent inhibitors of the Map Kinase p83. *Bioorg. Med. Chem. Lett.* **1998**, 3335–3340.
13. Gavrin, L. L., et al. Inhibition of Tpl2 kinase and TNF- $\alpha$  production with 1,7-naphthyridine-3-carbonitriles: synthesis and structure-activity relationships. *Bioorg. Med. Chem. Lett.* **2005**, *15*, 5288–92.
14. Kottirsch, G., et al. Beta-aryl-succinic acid hydroxamates as dual inhibitors of matrix metalloproteinases and tumor necrosis factor alpha converting enzyme. *J Med Chem.* **2002**, *45*, 2289–93.
15. Seo, H-S., et al. Apigenin Inhibits Tumor Necrosis Factor- $\alpha$ -Induced Production and Gene Expression of Mucin through Regulating Nuclear Factor-Kappa B Signaling Pathway in Airway Epithelial Cells. *Biomol. Ther.* **2014**, *22*, 525–31.
